# Supplementary material
Source: publisher site journal article supplement (https://www.dovepress.com/article/453275)
Supplement: Supplementary file 1 [file get_supplementary_file.php]

Supporting Information

**Multimodal Imaging-Guided Synergistic Photodynamic Therapy Using Carbonized Zn/Co Metal-Organic Framework Loaded with Cytotoxin Against Liver Cancer**

Jingmei Huang1†，Lianshan Guo1†，Xiaoxiao Huang1，Xiaoping Yu2，Liqiao Lin1，Xinlin Jiang3，Zhihao Bai4* and Zhengzhao Li1*


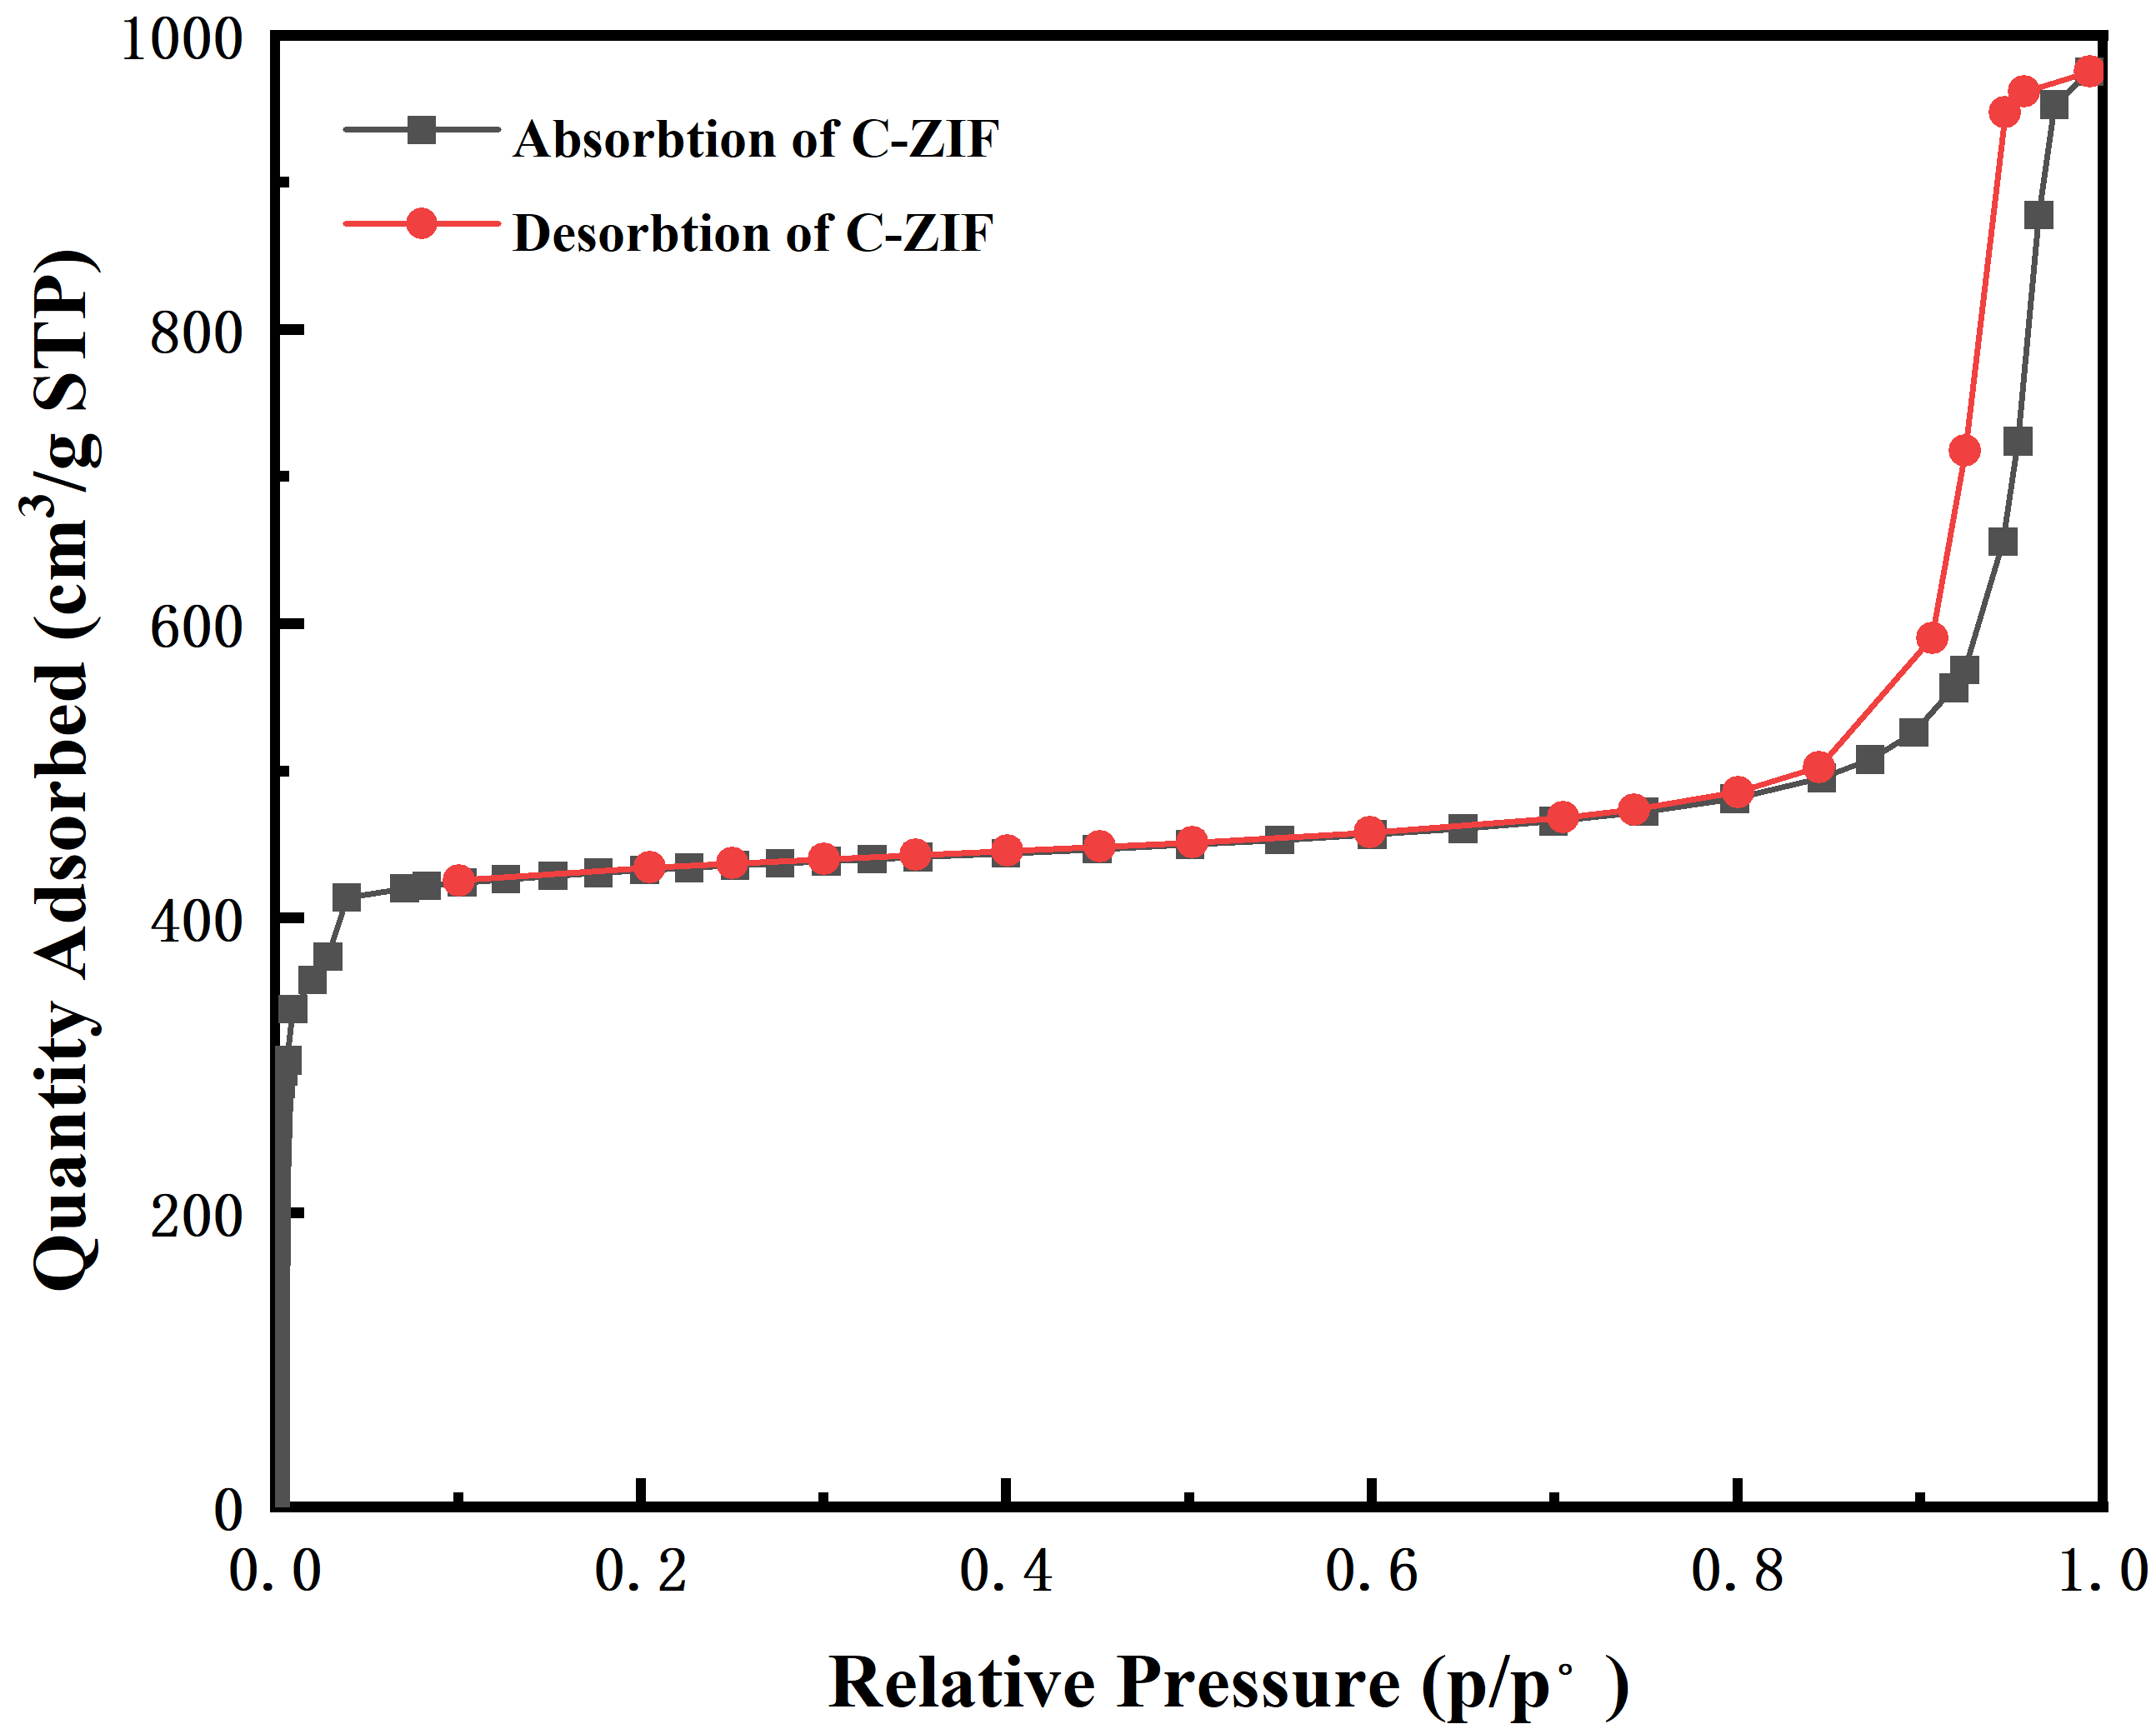


Figure S1. BET of C-ZIF.


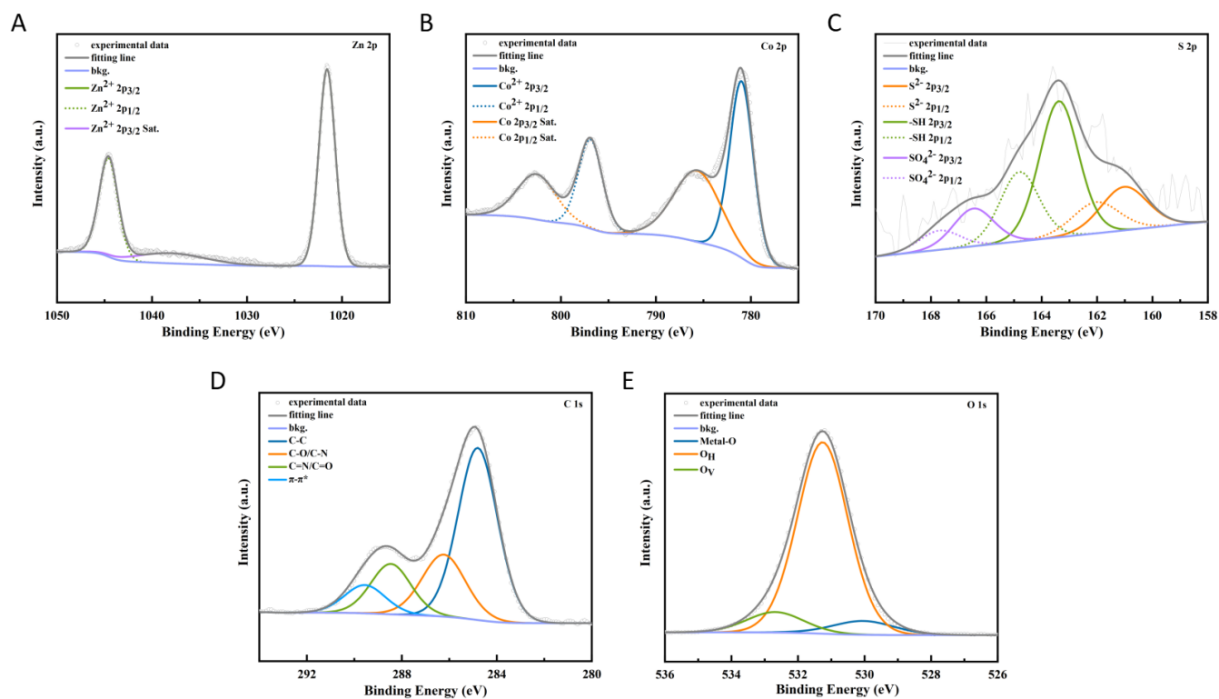


Figure S2. XPS of Zn、Co、S、C、O in RPZC NPs.


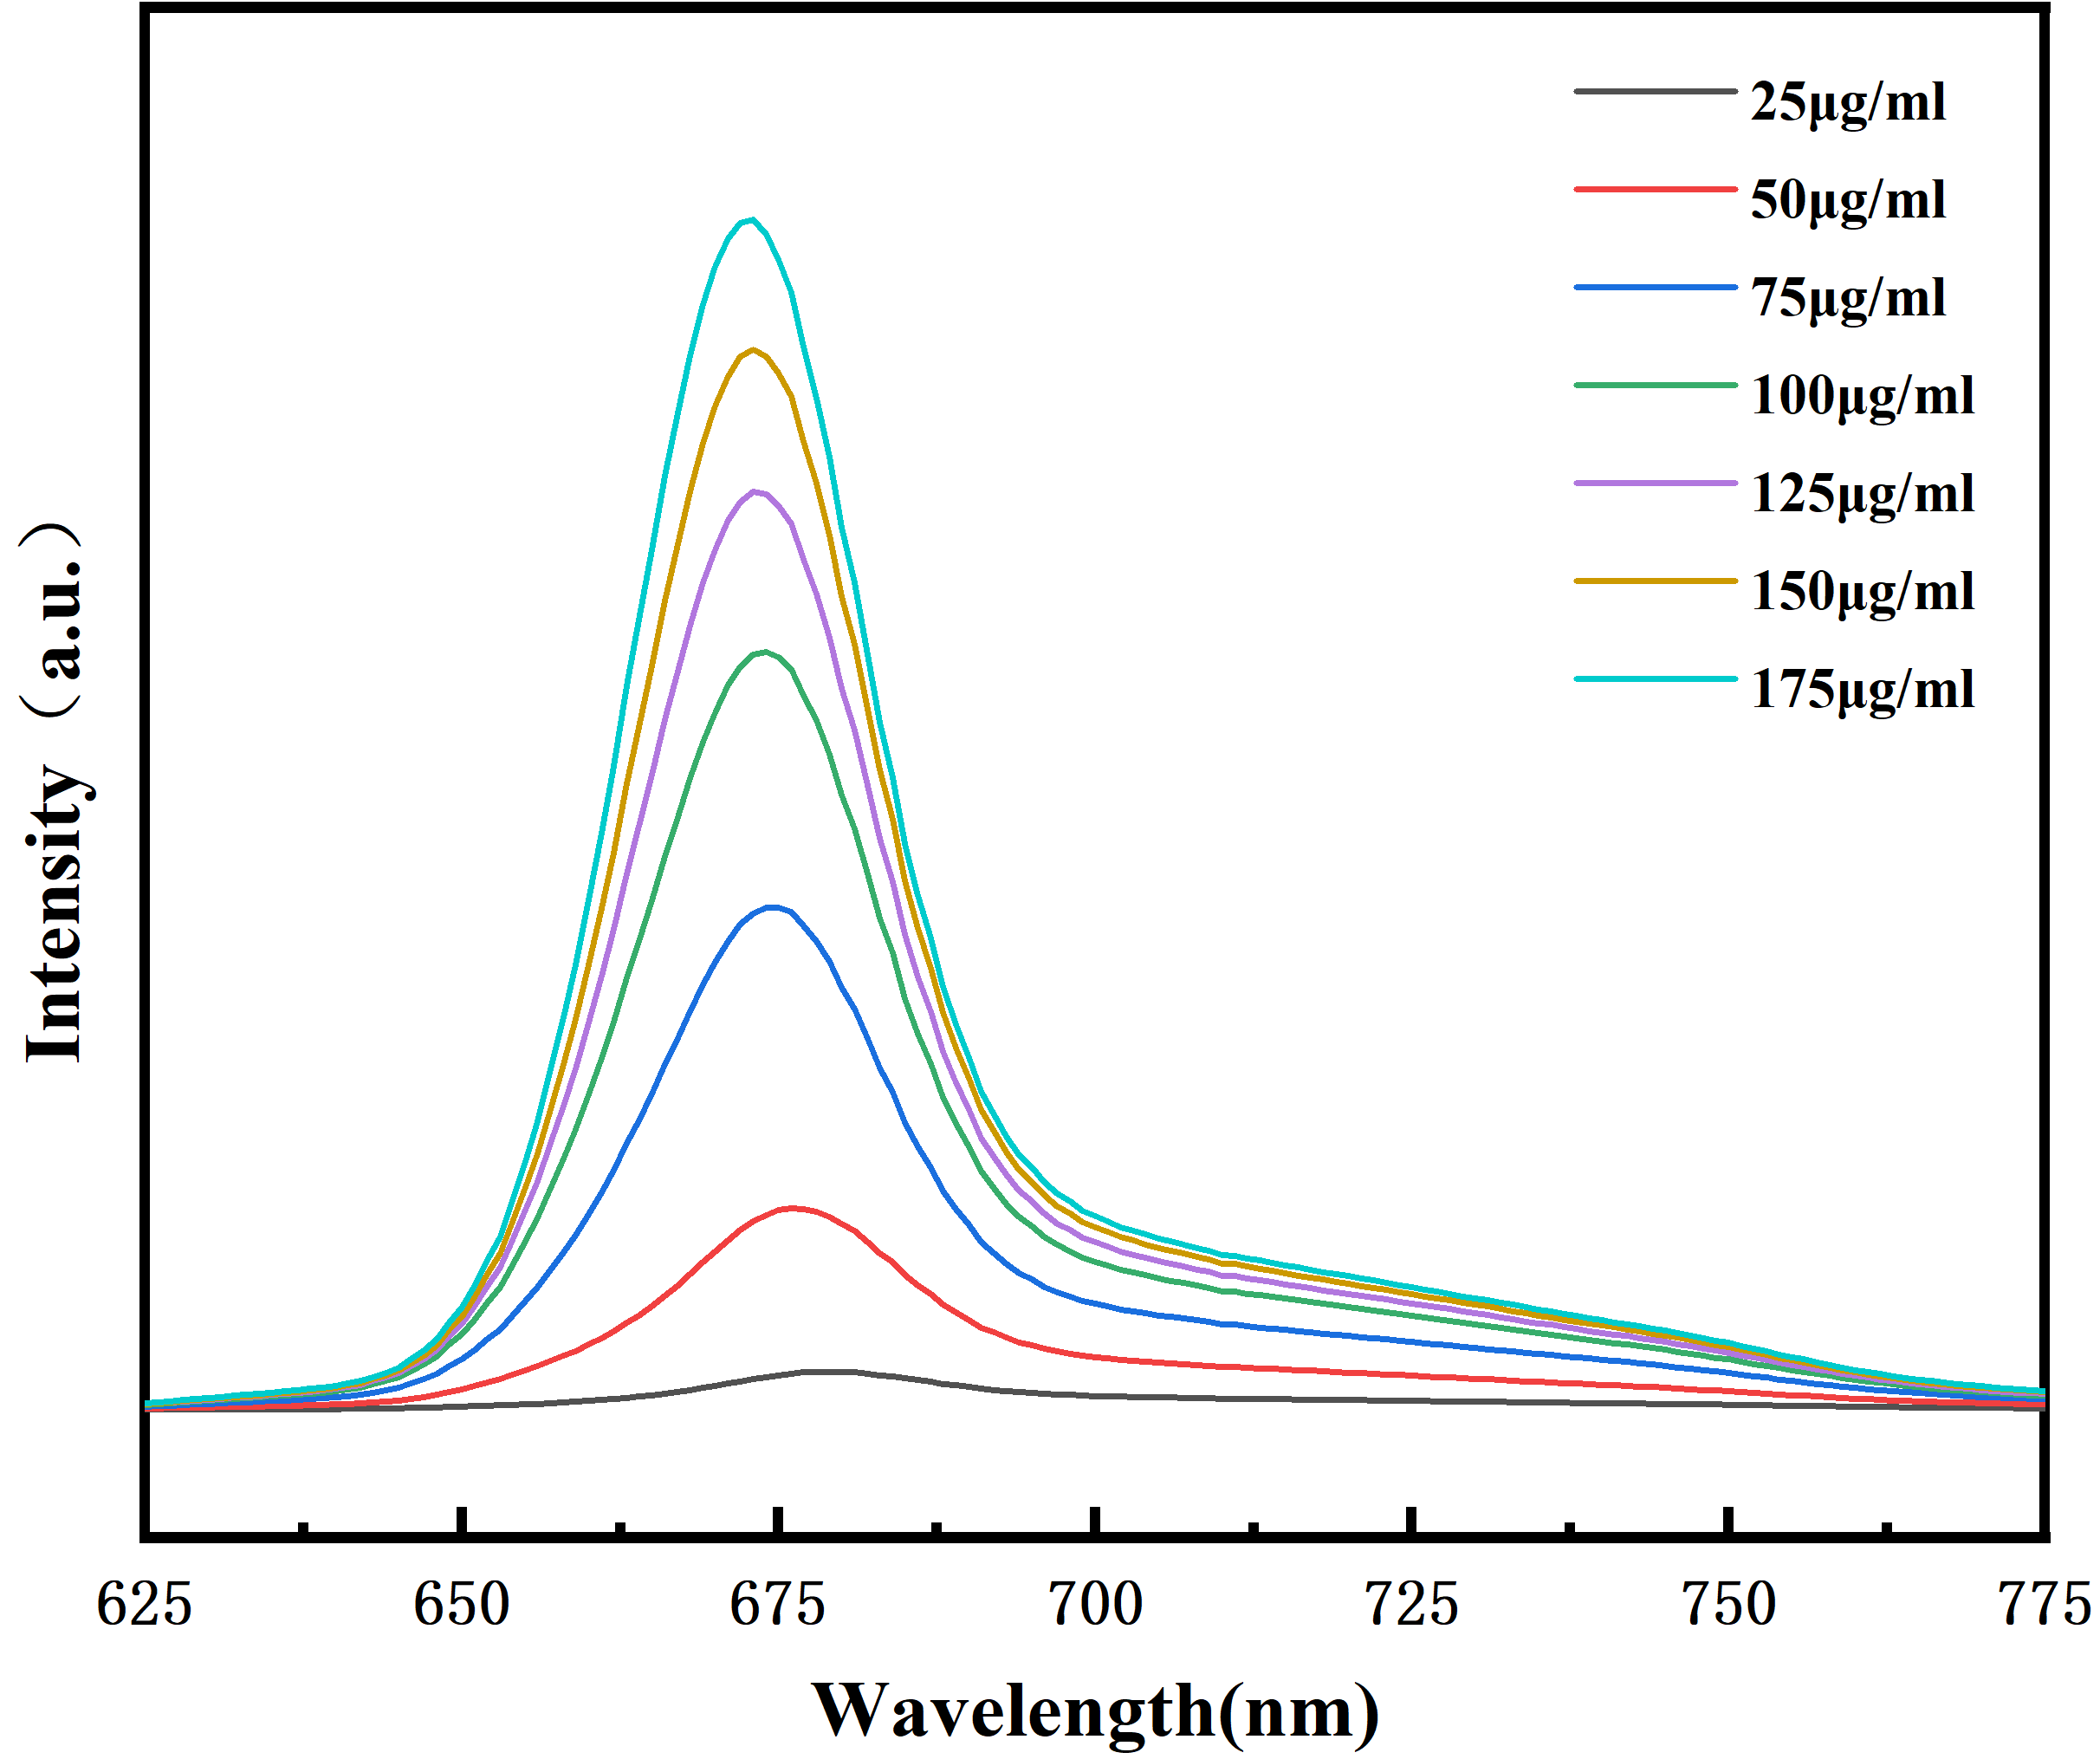


Figure S3. Fluorescence Spectrum of RZCP NPs.


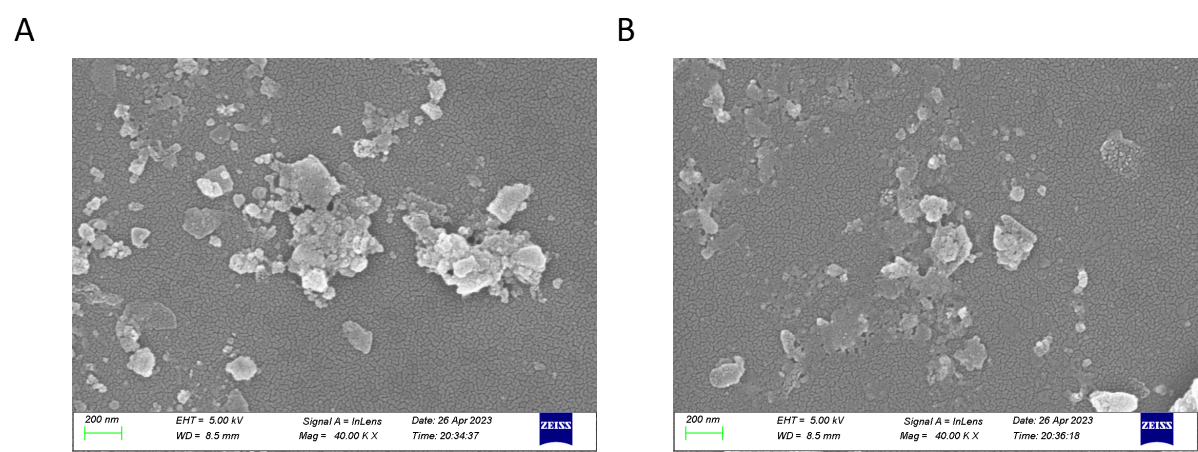


Figure S4.Disintegration of RPZC NPs in solutions with varying pH levels(A) pH 5.5; (B) pH 4.5.
